# Supplementary material
Source: MDPI journal article supplement (https://www.mdpi.com/1999-4907/10/12/1125)
Supplement: s1 [file s1]

**Figure S1.** Mulch layer C content ( $\text{kg ha}^{-1}$ ) of an improved-fallow slash-and-mulch agroforestry system in Eastern Amazonia of Brazil. Site establishment via mulching tractor took place in June 2005 and was abandoned to secondary succession in 2007 before the second rotation was established via mulching tractor in July 2014. Treatments were assigned in a split-plot design as follows: main-plot treatment of P+K fertilization (PK+) or without (PK-), and sub-plot treatment with the inclusion the N-fixing tree *Inga edulis* in the 5 species planting mix (I+) or without (I-).

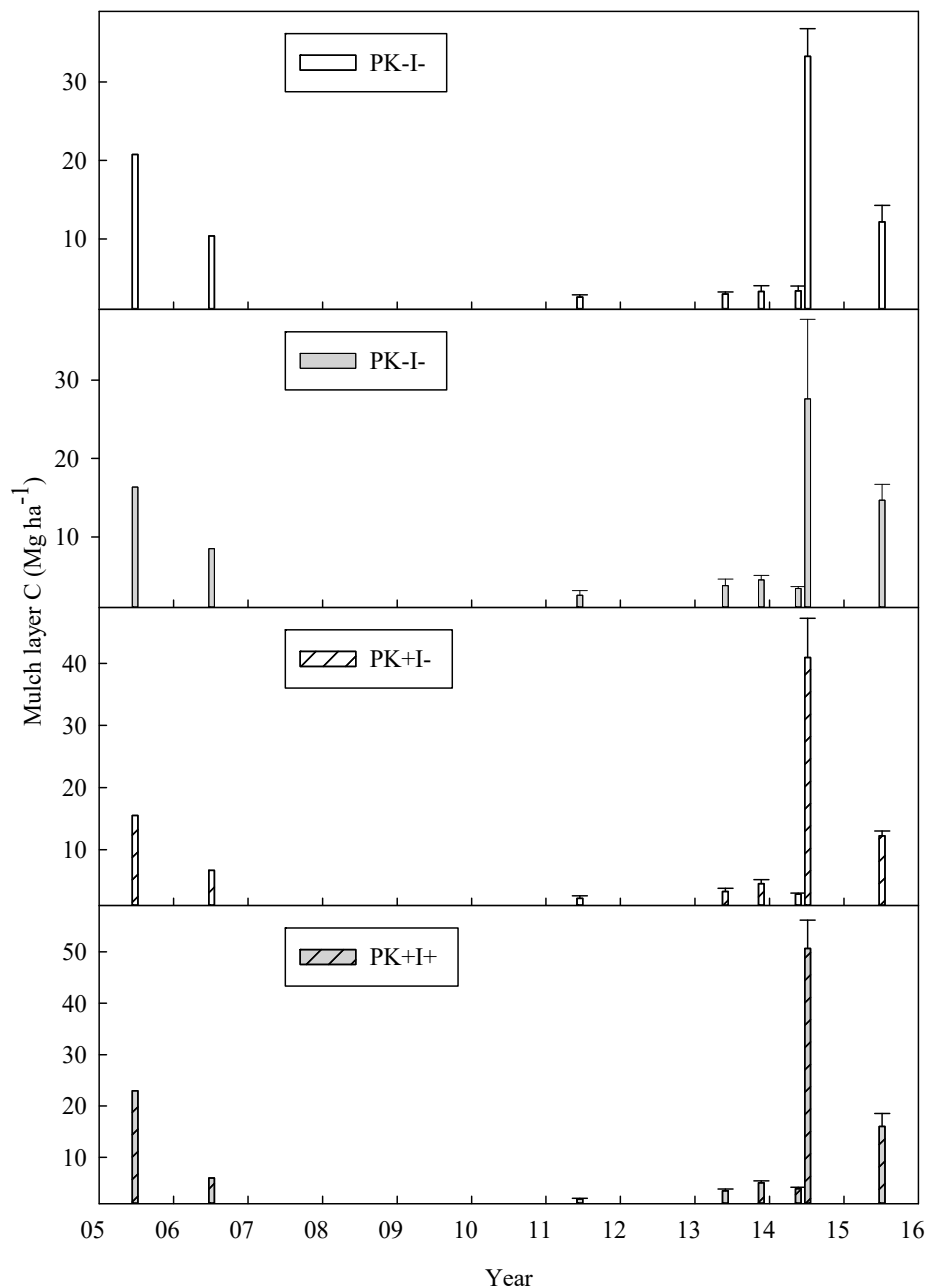

**Figure S2.** Soil-C content by depth increments 0 – 10 and 10 – 20 cm in an improved-fallow slash-and-mulch agroforestry system in Eastern Amazonia, Brazil. Site establishment via mulching tractor took place in June 2005 and was abandoned to secondary succession in 2007 before the 2nd Rotation was established via mulching tractor in July 2014. Treatments were assigned in a split-plot design as follows: main-plot treatment of P+K fertilization (PK+) or without (PK-), and sub-plot treatment with the inclusion the N-fixing tree *Inga edulis* in the 5 species planting mix (I+) or without (I-).

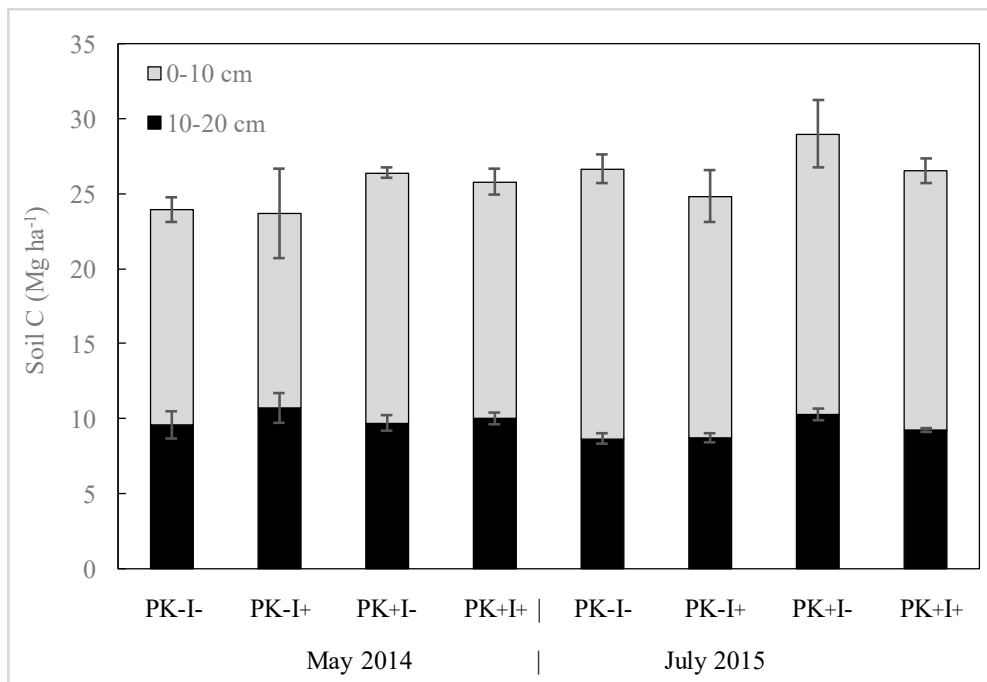

**Table S1.** Soil particle-size distribution at different depths in an improved-fallow slash-and-mulch agroforestry system in Eastern Amazonia, Brazil.

| Depth (cm) | Sand          | Silt       | Clay       | Soil Texture    |
|------------|---------------|------------|------------|-----------------|
|            | ----- % ----- |            |            |                 |
| 0 - 10     | 66.9 ± 1.6    | 12.9 ± 1.6 | 20.1 ± 2.1 | Sandy Clay Loam |
| 10 - 20    | 58.5 ± 2.5    | 9.1 ± 2.4  | 32.4 ± 0.6 | Sandy Clay Loam |
| 20 - 50    | 49.0 ± 1.2    | 5.4 ± 0.6  | 45.7 ± 0.6 | Sandy Clay      |
| 50 - 100   | 44.3 ± 2.6    | 4.7 ± 0.6  | 51.0 ± 2.4 | Clay            |
| 100 - 150  | 41.1 ± 1.6    | 4.1 ± 0.6  | 54.8 ± 1.3 | Clay            |
| 150 - 200  | 40.2 ± 0.7    | 3.5 ± 1.2  | 56.3 ± 1.2 | Clay            |

**Table S2.** Differences in survival of five species of native trees after 24 months after planting of Rotation 1 and newly planted trees at 20 months of Rotation 2 of a crop-fallow agroforestry system in eastern Amazonia of Brazil. Trees and crops were initially planted in 2005, were abandoned to secondary succession in 2007 until 2014 when the second Rotation of the crop-fallow system was planted and subsequently abandoned to secondary succession in 2016. \*indicate significant differences within species between 1<sup>st</sup> Year of Rotation 1 and 1<sup>st</sup> Year of Rotation 2.

| Species                        | Fert <sup>1</sup> |         | Nfix <sup>2</sup> |        |
|--------------------------------|-------------------|---------|-------------------|--------|
|                                | F Value           | Pr > F  | F Value           | Pr > F |
| <i>Cedrela odorata</i>         | 43.6              | <.0001* | 2.5               | 0.12   |
| <i>Ceiba pentandra</i>         | 17.6              | <.0001* | 1.2               | 0.3    |
| <i>Inga edulis</i>             | 21.3              | <.0001* | ---               | ---    |
| <i>Parkia multijuga</i>        | 14.7              | 0.0003* | ---               | ---    |
| <i>Schizolobium amazonicum</i> | 0.8               | 0.4     | 0.6               | 0.4    |

<sup>1</sup>Main-plot treatment with or without P+K fertilization

<sup>2</sup>Sub-plot treatment with or without *Inga edulis* or *Parkia multijuga* in planting mix

**Table S3.** Statistical contrasts of Height, DBH, and GLD of five species of native trees grown in mixed-culture, crop-fallow agroforestry system in eastern Amazonia of Brazil. Trees and crops were initially planted in 2005, abandoned to secondary succession in 2007 until 2014, when the second Rotation of the crop-fallow system was planted and subsequently abandoned to secondary succession in 2016. Contrast statements compare growth during Year 9 of Rotation1 and again during Year 2 of Rotation 2.

|               | All Species |        |         |        |         |        | <i>Cedrela odorata</i> |        |         |        |         |        | <i>Ceiba pentandra</i> |        |         |        |         |        | <i>Inga edulis</i> |        |         |        |         |        | <i>Parkia multijuga</i> |        |         |        |         |        | <i>Schizolobium amzonicum</i> |        |     |   |        |       |
|---------------|-------------|--------|---------|--------|---------|--------|------------------------|--------|---------|--------|---------|--------|------------------------|--------|---------|--------|---------|--------|--------------------|--------|---------|--------|---------|--------|-------------------------|--------|---------|--------|---------|--------|-------------------------------|--------|-----|---|--------|-------|
|               | GLD         |        | DBH     |        | Height  |        | GLD                    |        | DBH     |        | Height  |        | GLD                    |        | DBH     |        | Height  |        | GLD                |        | DBH     |        | Height  |        | GLD                     |        | DBH     |        | Height  |        | GLD                           |        | DBH |   | Height |       |
|               | F Value     | Pr > F | F Value | Pr > F | F Value | Pr > F | F Value                | Pr > F | F Value | Pr > F | F Value | Pr > F | F Value                | Pr > F | F Value | Pr > F | F Value | Pr > F | F Value            | Pr > F | F Value | Pr > F | F Value | Pr > F | F Value                 | Pr > F | F Value | Pr > F | F Value | Pr > F | F Value                       | Pr > F |     |   |        |       |
| Rotation<br>1 | 0.1         | 0.7    | 0.9     | 0.4    | 0.1     | 0.7    | .                      | .      | .       | .      | .       | .      | 0.4                    | 0.5    | 0.3     | 0.6    | 0.2     | 0.7    | 0.0                | >0.9   | .       | .      | 0.0     | 0.9    | 0.2                     | 0.6    | .       | .      | 0.2     | 0.6    | .                             | .      | .   | . | .      | .     |
| Rotation<br>2 | 3.9         | 0.06*  | 1.3     | 0.3    | 0.4     | 0.5    | 0.4                    | 0.7    | .       | .      | 2.6     | 0.01*  | 2.0                    | 0.16   | 3.1     | 0.11   | 0.1     | 0.7    | 0.8                | 0.4    | .       | .      | 4.9     | 0.04*  | 0.9                     | 0.4    | .       | .      | 0.1     | 0.8    | 2.4                           | 0.13   | .   | . | 6.6    | 0.01* |

\*indicates significant difference at the p<0.05 level

\*indicates significant difference at the p<0.10 level

**Table S4.** Sum of estimated total planted-tree aboveground biomass (kg) by plot and total biomass-N of planted-trees (g), and Percent (%) by Species of Total Biomass and Total N, at four different dates. Five species of native trees were grown in a mixed-culture, crop-fallow agroforestry system in eastern Amazonia of Brazil. Trees and crops were initially planted in 2005, abandoned to secondary succession in 2007 until 2014, when the second Phase of the crop-fallow system was planted and subsequently abandoned to secondary succession in 2016.

| Treatment | Species                        | March 2006  |            | March 2014  |            | November 2014 |            | March 2016  |            | March 2006 |              | March 2014 |            | November 2014 |            | March 2016 |            |
|-----------|--------------------------------|-------------|------------|-------------|------------|---------------|------------|-------------|------------|------------|--------------|------------|------------|---------------|------------|------------|------------|
|           |                                | Sum Biomass | % of Total | Sum Biomass | % of Total | Sum Biomass   | % of Total | Sum Biomass | % of Total | Mass N     | % of Total N | Mass N     | % of Total | Mass N        | % of Total | Mass N     | % of Total |
| PK-I-     | <i>Cedrela odorata</i>         | 0.3         | 9.4        | 27.9        | 27.3       | 15.8          | 76.1       | 17.0        | 65.9       | 4.2        | 23.2         | 133.8      | 25.3       | 70.6          | 46.3       | 68.6       | 42.1       |
|           | <i>Ceiba pentandra</i>         | 2.6         | 83.7       | 17.6        | 17.2       | 4.8           | 23.3       | 5.1         | 19.8       | 13.6       | 74.8         | 296.1      | 56.0       | 81.7          | 53.5       | 85.9       | 52.6       |
|           | <i>Parkia multijuga</i>        |             |            |             |            | 0.1           | 0.3        | 1.8         | 7.1        |            |              |            |            | 0.2           | 0.1        | 5.4        | 3.3        |
|           | <i>Schizolobium amazonicum</i> | 0.2         | 6.9        | 56.5        | 55.4       | 0.1           | 0.3        | 1.8         | 7.2        | 0.4        | 2.1          | 98.5       | 18.6       | 0.1           | 0.1        | 3.2        | 2.0        |
|           | Planted-Trees                  | 3.1         |            | 101.9       |            | 20.8          |            | 25.7        |            | 18.2       |              | 528.4      |            | 152.7         |            | 163.1      |            |
|           | Sum                            |             |            |             |            |               |            |             |            |            |              |            |            |               |            |            |            |
| PK-I+     | <i>Cedrela odorata</i>         | 0.2         | 2.9        | 7.7         | 3.6        | 6.9           | 4.9        | 6.6         | 3.5        | 2.1        | 7.4          | 41.7       | 4.6        | 62.1          | 13.3       | 27.7       | 4.7        |
|           | <i>Ceiba pentandra</i>         | 1.3         | 24.5       | 4.0         | 1.9        | 0.3           | 0.2        | 0.8         | 0.4        | 6.5        | 22.4         | 67.1       | 7.3        | 4.8           | 1.0        | 13.1       | 2.2        |
|           | <i>Inga edulis</i>             | 3.2         | 62.7       | 35.9        | 16.9       | 0.4           | 0.3        | 1.5         | 0.8        | 19.1       | 65.9         | 174.5      | 19.1       | 3.2           | 0.7        | 11.2       | 1.9        |
|           | <i>Parkia multijuga</i>        | 0.3         | 6.0        | 165.3       | 77.6       | 133.3         | 94.6       | 179.0       | 94.9       | 0.9        | 3.1          | 630.2      | 69.0       | 396.7         | 85.0       | 532.9      | 90.9       |
|           | <i>Schizolobium amazonicum</i> | 0.2         | 3.9        |             |            | 0.03          | 0.02       | 0.7         | 0.4        | 0.3        | 1.2          |            |            | 0.1           | 0.01       | 1.3        | 0.2        |
|           | Planted-Trees                  | 5.1         |            | 212.9       |            | 140.9         |            | 188.7       |            | 29.0       |              | 913.5      |            | 466.9         |            | 586.2      |            |
| PK-I-     | <i>Cedrela odorata</i>         | 0.1         | 0.6        | 12.3        | 2.0        | 18.7          | 14.3       | 11.6        | 5.8        | 1.2        | 3.9          | 43.4       | 1.2        | 53.6          | 2.8        | 38.6       | 1.7        |
|           | <i>Ceiba pentandra</i>         | 1.9         | 13.8       | 162.4       | 27.0       | 111.3         | 85.2       | 129.6       | 65.3       | 9.6        | 31.3         | 2739.1     | 77.7       | 1876.6        | 97.2       | 2186.0     | 93.7       |
|           | <i>Parkia multijuga</i>        |             |            |             |            | 0.1           | 0.04       | 7.2         | 3.7        |            |              |            |            | 0.2           | 0.01       | 21.6       | 0.9        |
|           | <i>Schizolobium amazonicum</i> | 11.5        | 85.5       | 427.3       | 71.0       | 0.5           | 0.4        | 50.0        | 25.2       | 20.0       | 64.9         | 744.8      | 21.1       | 0.9           | 0.05       | 87.1       | 3.7        |
|           | Planted-Trees                  | 13.4        |            | 602.0       |            | 130.5         |            | 198.4       |            | 30.8       |              | 3527.2     |            | 1931.4        |            | 2333.3     |            |
|           | Sum                            |             |            |             |            |               |            |             |            |            |              |            |            |               |            |            |            |
| PK-I+     | <i>Cedrela odorata</i>         | 0.0         | 0.3        |             |            | 0.1           | 0.04       | 0.3         | 0.2        | 0.5        | 1.1          |            |            | 0.9           | 0.04       | 4.5        | 0.3        |
|           | <i>Ceiba pentandra</i>         | 0.9         | 7.8        | 97.7        | 17.0       | 115.9         | 71.7       | 77.1        | 48.8       | 4.5        | 10.6         | 1647.0     | 55.4       | 1955.6        | 93.4       | 1299.8     | 0.0        |
|           | <i>Inga edulis</i>             | 4.0         | 36.0       | 109.2       | 19.0       | 0.3           | 0.2        | 3.4         | 2.2        | 26.9       | 62.8         | 584.3      | 19.6       | 2.6           | 0.1        | 25.3       | 1.6        |
|           | <i>Parkia multijuga</i>        | 0.0         | 0.4        | 82.0        | 14.3       | 45.3          | 28.0       | 63.3        | 40.1       | 0.1        | 0.3          | 244.2      | 8.2        | 134.9         | 6.4        | 188.4      | 12.2       |
|           | <i>Schizolobium amazonicum</i> | 6.2         | 55.5       | 285.7       | 49.7       | 0.1           | 0.04       | 13.8        | 8.7        | 10.8       | 25.3         | 498.0      | 16.7       | 0.1           | 0.005      | 24.0       | 1.6        |
|           | Planted-Trees                  | 11.2        |            | 574.6       |            | 161.7         |            | 157.8       |            | 42.9       |              | 2973.5     |            | 2094.1        |            | 1541.9     |            |

**Table S5.** Statistical output of *Manihot esculenta* biomass and N content (kg ha<sup>-1</sup>) by root, stem, leaf compartments, and sum of all compartments, measured at Year 1 after establishment of Rotation 2 (2015) of crop-fallow system in Eastern Amazonia of Brazil. The site was established as an improved-fallow slash-and-mulch agroforestry system with a split-plot design with the main-plot treatment of P+K fertilization or without (Fert), and the sub-plot treatment with the N-fixing tree *Inga edulis* in the 5-species planting mix, or without (Nfix).

| Variable  | Treatment         | Type III SS | F Value | Pr > F |
|-----------|-------------------|-------------|---------|--------|
| Root Mass | Fert <sup>1</sup> | 0.634       | 7.4     | 0.07   |
|           | Nfix <sup>2</sup> | 0.001       | 0.01    | 0.94   |
| Stem Mass | Fert              | 0.864       | 6.3     | 0.09   |
|           | Nfix              | 0.004       | 0.1     | 0.83   |
| Leaf Mass | Fert              | 0.625       | 6.4     | 0.09   |
|           | Nfix              | 0.029       | 0.1     | 0.79   |
| Sum Mass  | Fert              | 0.693       | 8.0     | 0.07   |
|           | Nfix              | 0.000       | 0.0     | 1.00   |
| Root N    | Fert              | 0.435       | 6.8     | 0.08   |
|           | Nfix              | 0.000       | 0.0     | 0.98   |
| Stem N    | Fert              | 1.020       | 11.6    | 0.04   |
|           | Nfix              | 0.012       | 0.1     | 0.77   |
| Leaf N    | Fert              | 0.564       | 6.4     | 0.08   |
|           | Nfix              | 0.011       | 0.02    | 0.89   |
| Sum N     | Fert              | 0.658       | 15.1    | 0.03   |
|           | Nfix              | 0.000       | 0.0     | 0.98   |

**Table S6.** Statistical output of Mulch layer Mass, N and C concentration, and N and C content of an improved-fallow slash-and-mulch agroforestry system in Eastern Amazonia of Brazil. Site establishment via mulching tractor took place in June 2005 and was abandoned to secondary succession in 2007 before the second rotation was established via mulching tractor in July 2014.

| Variable    | Treatment               | F Value | Pr > F |
|-------------|-------------------------|---------|--------|
| Litter Mass | Nfix <sup>1</sup>       | 4.5     | 0.04   |
|             | Date                    | 371.1   | <.0001 |
| Litter [N]  | Date                    | 10.7    | <.0001 |
| Litter [C]  | Date                    | 14.3    | <.0001 |
| Litter N    | Date                    | 130.6   | <.0001 |
| Content     | Fert <sup>2</sup> *Date | 2.4     | 0.06   |
| Litter C    | Nfix                    | 5.1     | 0.03   |
| Content     | Date                    | 212.2   | <.0001 |

<sup>1</sup>Sub-plot treatment inclusion of N-fixing *I. edulis*, or not

<sup>2</sup>Main-plot treatment of P+K fertilization, or not

**Table S7.** Statistical output of significant differences for plot-level soil sampling at 0–10 cm depth of an improved-fallow slash-and-mulch agroforestry system in Eastern Amazonia, Brazil. Site establishment via mulching tractor took place in June 2005 and was abandoned to secondary succession in 2007 before the second rotation was established via mulching tractor in July 2014. Sampling for plot-level soil took place in June 2013 and May 2014 prior to secondary forest conversion, and in July 2015, one year after conversion to second rotation of mixed-species agroforestry system.

| Effect            | Soil-C  |        | Soil-N  |        | Soil C:N |         |
|-------------------|---------|--------|---------|--------|----------|---------|
|                   | F Value | Pr > F | F Value | Pr > F | F Value  | Pr > F  |
| Fert <sup>1</sup> | 0.3     | 0.6    | 1.2     | 0.4    | 0.1      | 0.8     |
| Nfix <sup>2</sup> | 0.4     | 0.5    | 0.0     | 0.9    | 1.8      | 0.2     |
| Fert*Nfix         | 0.2     | 0.7    | 0.1     | 0.8    | 0.1      | 0.7     |
| Date              | 0.1     | 0.9    | 10.2    | 0.003* | 24.7     | <.0001* |
| Fert*Date         | 0.3     | 0.7    | 0.2     | 0.8    | 2.0      | 0.2     |
| Nfix*Date         | 0.5     | 0.6    | 1.3     | 0.3    | 1.0      | 0.4     |
| Fert*Nfix*Date    | 0.6     | 0.6    | 1.4     | 0.3    | 0.3      | 0.8     |

<sup>1</sup>Main-plot treatment of P+K fertilization or without

<sup>2</sup>Sub-plot treatment of *Inga edulis* in 5-species planting mix or not

**Table S8.** Soil N and C concentrations (%) in the 0–10 and 10–20 cm depths at three different years during the first rotation of a slash-and-mulch agroforestry system in eastern Amazonia of Brazil. Main-plot treatment with (PK+) or without (PK–) P+K fertilizer, and sub-plot treatment with (I+) or without (I–) the presence of the N-fixing *Inga edulis*.

| Block | Depth  | 2005 |                      | Treatment | Depth  | 2006        |                      | 2011        |                      |
|-------|--------|------|----------------------|-----------|--------|-------------|----------------------|-------------|----------------------|
|       |        | N    | C <sub>organic</sub> |           |        | N           | C <sub>organic</sub> | N           | C <sub>organic</sub> |
|       | cm     | %    |                      |           | cm     | % (SE)      |                      | % (SE)      |                      |
| A     | 0 - 10 | 0.15 | 1.71                 | PK-I-     | 0 - 10 | 0.18 (0.04) | 2.29 (0.05)          | 0.08 (0.00) | 2.55 (0.77)          |
|       | 10 -20 | 0.1  | 1.03                 |           | 10 -20 | 0.11 (0.01) | 2.29 (1.27)          | 0.07 (0.01) | 1.47 (0.26)          |
| B     | 0 - 10 | 0.15 | 1.82                 | PK-I+     | 0 - 10 | 0.15 (0.01) | 1.96 (0.20)          | 0.05 (0.01) | 1.95 (0.14)          |
|       | 10 -20 | 0.1  | 1.19                 |           | 10 -20 | 0.11 (0.01) | 1.20 (0.07)          | 0.07 (0.01) | 1.24 (0.06)          |
| C     | 0 - 10 | 0.17 | 1.92                 | PK+I-     | 0 - 10 | 0.13 (0.02) | 3.24 (1.45)          | 0.04 (0.01) | 2.95 (1.07)          |
|       | 10 -20 | 0.13 | 0.95                 |           | 10 -20 | 0.12 (0.01) | 2.43 (1.30)          | 0.03 (0.00) | 2.12 (0.97)          |
| D     | 0 - 10 | 0.18 | 2.05                 | PK+I+     | 0 - 10 | 0.14 (0.01) | 2.83 (1.08)          | 0.04 (0.02) | 2.78 (0.94)          |
|       | 10 -20 | 0.13 | 1.27                 |           | 10 -20 | 0.12 (0.02) | 2.66 (1.47)          | 0.05 (0.01) | 1.95 (0.72)          |

**Table S9.** Statistical output of significant differences for plot-level soil sampling at 0–10 vs. 10–20 cm depths of an improved-fallow slash-and-mulch agroforestry system in Eastern Amazonia, Brazil. Site establishment via mulching tractor took place in June 2005 and was abandoned to secondary succession in 2007 before the 2<sup>nd</sup> Rotation was established via mulching tractor in July 2014. Sampling for soil depths took place in May 2014 prior to secondary forest conversion, and in July 2015, one year after conversion to second rotation of mixed-species agroforestry system.

| Treatment       | N        |                     |           |                     | C        |                     |           |                     |
|-----------------|----------|---------------------|-----------|---------------------|----------|---------------------|-----------|---------------------|
|                 | May 2014 |                     | July 2015 |                     | May 2014 |                     | July 2015 |                     |
|                 | F Value  | Pr > F              | F Value   | Pr > F              | F Value  | Pr > F              | F Value   | Pr > F              |
| Fert            | 0.0      | 0.89                | 1.1       | 0.36                | 4.9      | 0.11                | 0.2       | 0.71                |
| Nfix            | 2.2      | 0.17                | 3.2       | 0.10 <sup>+</sup>   | 2.2      | 0.17                | 3.5       | 0.09 <sup>+</sup>   |
| Fert*Nfix       | 1.3      | 0.28                | 0.1       | 0.75                | 0.4      | 0.53                | 0.2       | 0.65                |
| Depth           | 52.0     | 0.0004 <sup>*</sup> | 102.2     | <.0001 <sup>*</sup> | 42.6     | 0.0006 <sup>*</sup> | 254.6     | <.0001 <sup>*</sup> |
| Depth*Fert      | 0.0      | 0.96                | 1.1       | 0.35                | 3.3      | 0.12                | 0.0       | 1.00                |
| Depth*Nfix      | 0.9      | 0.37                | 4.3       | 0.06 <sup>+</sup>   | 2.2      | 0.17                | 3.2       | 0.10 <sup>+</sup>   |
| Depth*Fert*Nfix | 0.6      | 0.47                | 0.0       | 0.96                | 0.5      | 0.52                | 1.2       | 0.29                |

**Table S10.** Statistical significance of P and K concentrations and content of Manioc by compartment, Mulch layer, and 0–10 cm Soil horizon. Statistical significance of effects in main-plot treatment with or without P+K fertilization (Fert) and sub-plot treatment with or without N-fixing *I. edulis* (Nfix) at the p=0.05 (\*) and 0.10 (†) level are indicated.

| Effect                   | Leaves  |        | Manioc Stems |        | Roots   |        | 2013    |        | Mulch 2014 |        | 2015    |        | 2013    |        | Soil (0 - 10 cm) 2014 |        | 2015    |        |
|--------------------------|---------|--------|--------------|--------|---------|--------|---------|--------|------------|--------|---------|--------|---------|--------|-----------------------|--------|---------|--------|
|                          | F Value | Pr > F | F Value      | Pr > F | F Value | Pr > F | F Value | Pr > F | F Value    | Pr > F | F Value | Pr > F | F Value | Pr > F | F Value               | Pr > F | F Value | Pr > F |
| P %                      |         |        |              |        |         |        |         |        |            |        |         |        |         |        |                       |        |         |        |
| Fert                     | 1.56    | 0.3    | 7.12         | 0.8†   | 1.77    | 0.3    | 10.35   | 0.05*  | 0.06       | 0.8    | 0.01    | 0.9    | 24.75   | 0.02*  | 4.23                  | 0.1    | 3.51    | 0.2    |
| Nfix                     | 0.01    | 0.9    | 1.12         | 0.3    | 3.25    | 0.1    | 1.16    | 0.3    | 0.37       | 0.5    | 0.58    | 0.5    | 4.17    | 0.09†  | 0.03                  | 0.9    | 3.41    | 0.08†  |
| Fert*Nfix                | 1.65    | 0.3    | 0.86         | 0.4    | 0.02    | 0.9    | 0.08    | 0.8    | 0.02       | 0.9    | 0.34    | 0.6    | 2.38    | 0.2    | 2.48                  | 0.1    | 0.87    | 0.4    |
| K %                      |         |        |              |        |         |        |         |        |            |        |         |        |         |        |                       |        |         |        |
| Fert                     | 0.58    | 0.5    | 1.99         | 0.3    | 2.18    | 0.2    | 2.54    | 0.2    | 1.69       | 0.3    | 0.62    | 0.5    | 0.68    | 0.5    | 0.17                  | 0.7    | 0.45    | 0.6    |
| Nfix                     | 0.11    | 0.7    | 0.02         | 0.9    | 0.02    | 0.9    | 1.87    | 0.2    | 0.58       | 0.5    | 0.43    | 0.5    | 0.79    | 0.4    | 0                     | 1.0    | 0.07    | 0.8    |
| Fert*Nfix                | 0.68    | 0.4    | 0.04         | 0.9    | 2.59    | 0.2    | 0.7     | 0.4    | 0.09       | 0.8    | 0.5     | 0.5    | 0.07    | 0.8    | 1.08                  | 0.3    | 0.52    | 0.5    |
| P (kg ha <sup>-1</sup> ) |         |        |              |        |         |        |         |        |            |        |         |        |         |        |                       |        |         |        |
| Fert                     | 3.95    | 0.14   | 9.87         | 0.05   | 4.95    | 0.11   | 9.1     | 0.06†  | 0.47       | 0.5    | 0.01    | 0.9    | 24.75   | 0.02*  | 4.23                  | 0.1    | 3.51    | 0.2    |
| Nfix                     | 0.05    | 0.8    | 0.03         | 0.9    | 0.75    | 0.4    | 0.03    | 0.9    | 23.51      | 0.003  | 1.16    | 0.3    | 4.17    | 0.09†  | 0.03                  | 0.9    | 3.41    | 0.08†  |
| Fert*Nfix                | 0       | 1.0    | 0            | 1.0    | 0.21    | 0.7    | 1.57    | 0.3    | 3          | 0.13   | 0.24    | 0.6    | 2.38    | 0.2    | 2.48                  | 0.1    | 0.87    | 0.4    |
| K (kg ha <sup>-1</sup> ) |         |        |              |        |         |        |         |        |            |        |         |        |         |        |                       |        |         |        |
| Fert                     | 1.94    | 0.3    | 1.21         | 0.4    | 1.91    | 0.3    | 0.68    | 0.5    | 0.26       | 0.6    | 0.99    | 0.4    | 0.68    | 0.5    | 0.17                  | 0.7    | 0.45    | 0.6    |
| Nfix                     | 0.19    | 0.7    | 0.04         | 0.8    | 0.04    | 0.8    | 0.33    | 0.6    | 0.57       | 0.5    | 0.17    | 0.7    | 0.79    | 0.4    | 0                     | 1.0    | 0.07    | 0.8    |
| Fert*Nfix                | 0       | 1.0    | 0.03         | 0.9    | 0.03    | 0.9    | 0.48    | 0.5    | 1.25       | 0.3    | 0.18    | 0.7    | 0.07    | 0.8    | 1.08                  | 0.3    | 0.52    | 0.5    |
